# Supplementary material for: The design and fabrication of nanoengineered platinum needles with laser welded carbon nanotubes (CNTs) for the electrochemical biosensing of cancer lymph nodes
Source: Royal Society of Chemistry journal article supplement (doi:10.1039/d1bm00875g), 2021-01-01
Supplement: d1bm00875g1.pdf [file d1bm00875g1.pdf]

1

## Supplementary Information

### 2 **Design and fabrication of nanoengineered Pt electrodes by laser welded CNTs** 3 **for electrochemical biosensing of cancer lymph nodes**

4 *Ashkan Zandi<sup>a,b</sup>, Zahra Davari sh.<sup>a</sup>, Fatemeh Shojaeian<sup>a,c</sup>, S. M. Sadegh Mousavi-kiasary<sup>a</sup>, Fereshteh Abbasvandi<sup>a,d</sup>,*  
5 *Afsoon Zandi<sup>e</sup>, Ali Gilani<sup>a</sup>, Zohre Saghafi<sup>a</sup>, Yasin Kordehlachin<sup>a</sup>, Amir Mamdouh<sup>a</sup>, Seyyed Hossein Miraghaie<sup>a</sup>,*  
6 *Meisam Hoseinyazdi<sup>f</sup>, Mohammad Ali Khayamian<sup>a,b</sup>, Robab Anbiaee<sup>g</sup>, Mohammad Faranoush<sup>h,i</sup>, Mohammad*  
7 *Abdolahad<sup>a,b,j</sup>*

8 *<sup>a</sup> Nano Electronic Center of Excellence, Nano-bioelectronic Devices Lab., Cancer Electronics Research Group,*  
9 *School of Electrical and Computer Eng., College of Engineering, University of Tehran, P.O. Box: 14395-515, Tehran,*  
10 *Iran.*

11 *<sup>b</sup> Nano Electronic Center of Excellence, Nano-electronics and Thin Film Lab., School of Electrical and Computer*  
12 *Eng., College of Engineering, University of Tehran, P.O. Box: 14395-515, Tehran, Iran.*

13 *<sup>c</sup> School of Medicine, Shahid Beheshti University of Medical Sciences, P.O. Box: 19615-1179, Tehran, Iran.*

14 *<sup>d</sup> ATMP Department, Breast Cancer Research Center, Motamed Cancer Institute, ACECR, P.O. Box: 1517964311,*  
15 *Tehran, Iran.*

16 *<sup>e</sup> Department of Otolaryngology, Head & Neck Surgery, Taleghani Hospital, Shahid Beheshti University of Medical*  
17 *Sciences, P.O. Box: 19615-1179, Tehran, Iran.*

18 *<sup>f</sup> Medical Imaging Research Center, Shiraz University of Medical Sciences, P.O. BOX: 71348-14336, Shiraz, Iran.*

19 *<sup>g</sup> Department of Radiation Oncology, Imam Hossein Hospital, Shahid Beheshti University of Medical Sciences, P.O.*  
20 *Box: 19615-1179, Tehran, Iran.*

21 *<sup>h</sup> Pediatric Growth and Development Research Center, Institute of Endocrinology and Metabolism, Iran University of*  
22 *Medical Sciences, P.O. Box: 1996713883, Tehran, Iran.*

23 *<sup>i</sup> Cardio-Oncology Research Center, Rajaie Cardiovascular Medical & Research Center, Iran University of Medical*  
24 *Sciences, P.O. Box: 1996911151, Tehran, Iran.*

25 *<sup>j</sup> School of Pharmacy, Tehran University of Medical Sciences, P.O. Box: 1416753955, Tehran, Iran.*

26 *\*Correspondent authors: [m.abdolahad@ut.ac.ir](mailto:m.abdolahad@ut.ac.ir)*

27

28

29

30

31

32

33 The mechanisms of tumor invasion to LNs are still unclear. Recent research indicated metabolic shift from  
34 hypoxia glycolysis toward FAO in cancer cells when they invade LNs<sup>1</sup>. Hence, our diagnostic approach is  
35 tracing FAO process by electrochemical recording the lipidic contents of the free and involved LNs.

36 Fundamentals of FAO metabolism of malignant cells in LNs were presented in figure S1. FAs consumption  
37 by cancer cells could be done by either direct exogenous uptake from the nearby microenvironment or using  
38 nutrients (such as glucose or glutamine) to synthesize *de novo*. Alterations in FA transport, *de novo*  
39 lipogenesis, storage as lipid droplets (LDs), and  $\beta$ -oxidation to generate Adenosine Triphosphate (ATP) are  
40 metabolisms of cancerous cells all known as lipidomic remodeling<sup>2,3</sup>.

41

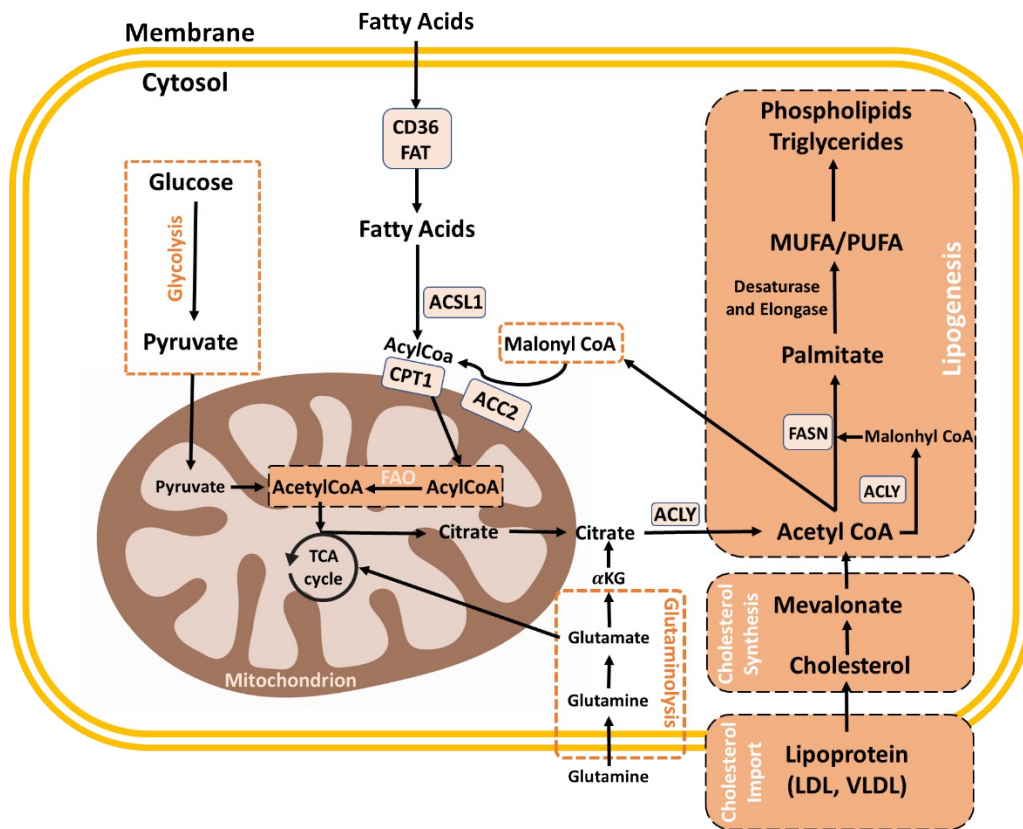

42

43

44 **Figure S1**, Cancer cells obtain fatty acids (FAs) in two main ways, direct exogenous uptake and *de novo* lipogenesis  
45 of them. There are different transporters that allow exogenous uptake of FAs from the surrounding microenvironment.  
46 CD36, FATPs and FABPpm are the most important ones. Abbreviations: CD36, Cluster of Differentiation 36; ACSL1,  
47 Acyl-CoA Synthetase Long-chain family member 1; CPT1, Carnitine Palmitoyltransferase 1; ACC, acetyl-CoA  
48 carboxylase; TCA, Tricarboxylic Acid Cycle; LDL, Low-Density Lipoproteins; VLDL, Very Low-Density Lipoprotein;  
49 ACLY, ATP-citrate lyase; FASN, fatty acid synthase; MUFAs, monounsaturated fatty acids; PUFAs, polyunsaturated  
50 fatty acids.

51

52

53

54

55  
56  
57  
58  
59  
60  
61  
62  
63

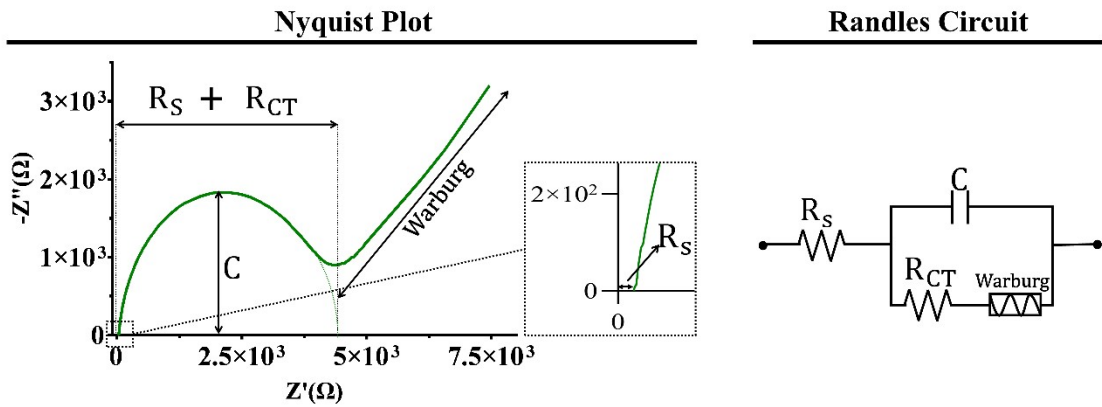

64  
65  
66  
67  
68  
69  
70  
71  
72  
73  
74  
75  
76  
77  
78  
79

**Figure S2**, Nyquist diagram. LDP response is a nyquist diagram which its equivalent circuit is of importance to analyze the data.  $R_{CT}$ , charge transfer resistance, is the most important element of an equivalent circuit.  $R_S$  (solution resistance),  $C$  (double layer capacitance), and Warburg (diffusion element) are the other elements of the equivalent circuit.

80 **Table S1, Principal demographic characteristics of the patients, the origin of disease, number of dissected LNs, IHC**  
 81 **tumor markers, and serum tumor markers.**

82

83

| Patient ID#                | 1                                            | 2                                  | 3                                            | 4                                     | 5                           | 6                              | 7                                   | 8                         | 9                              | 10                                           | 11                                  |
|----------------------------|----------------------------------------------|------------------------------------|----------------------------------------------|---------------------------------------|-----------------------------|--------------------------------|-------------------------------------|---------------------------|--------------------------------|----------------------------------------------|-------------------------------------|
| Age                        | 58                                           | 31                                 | 46                                           | 42                                    | 44                          | 352                            | 51                                  | 42                        | 44                             | 32                                           | 39                                  |
| Height (m)                 | 1.62                                         | 1.59                               | 1.50                                         | 1.67                                  | 1.73                        | 1.61                           | 1.74                                | 1.58                      | 1.52                           | 1.65                                         | 1.62                                |
| Weight (Kg)                | 69                                           | 72                                 | 60                                           | 68                                    | 108                         | 86                             | 73                                  | 81                        | 89                             | 93                                           | 88                                  |
| Sex                        | Female                                       | Female                             | Female                                       | Female                                | Female                      | Female                         | Female                              | Female                    | Female                         | Female                                       | Female                              |
| Cancer Type                | Metastatic<br>Ductal Carcinoma               | Invasive Ductal Carcinoma          | Invasive Ductal Carcinoma                    | Invasive Ductal Carcinoma             | Invasive Ductal Carcinoma   | Invasive Ductal Carcinoma      | Invasive Ductal Carcinoma           | Invasive Ductal Carcinoma | Invasive Ductal Carcinoma      | Invasive Ductal Carcinoma                    | Invasive Ductal Carcinoma           |
| Primary Tumor Site         | Right Breast; 4<br>5 O'clock<br>Retroareola. | Left Breast<br>Mass; 11<br>O'clock | Left Breast<br>Mass; Upper<br>Outer Quadrant | Right Breast<br>Mass; 9-10<br>O'clock | Right Breast; 12<br>O'clock | Right Breast<br>Mass; Mid Zone | Right Breast<br>Mass; 10<br>O'clock | Right Breast              | Left Breast<br>Mass; 2 O'clock | Left Breast<br>Mass; Upper<br>Outer Quadrant | Left Breast<br>Mass; 3-5<br>O'clock |
| Tumor Size (Largest Tumor) | 19×19×5.5 mm <sup>3</sup>                    | 42×17 mm <sup>2</sup>              | 40×25 mm <sup>2</sup>                        | 30×11 mm <sup>2</sup>                 | 18×8 mm <sup>2</sup>        | 21×11 mm <sup>2</sup>          | 26×20×17 mm <sup>3</sup>            | 40×40 mm <sup>2</sup>     | 26×25 mm <sup>2</sup>          | 34×25 mm <sup>2</sup>                        | 26×19×12 mm <sup>3</sup>            |
| Lymph Node                 | 1                                            | 1                                  | 1                                            | 2                                     | 1                           | 1                              | 1                                   | 1                         | 2                              | 2                                            | 1                                   |
| Non-Sentinel               | 2                                            | 1                                  | 1                                            | 0                                     | 3                           | 2                              | 1                                   | 1                         | 0                              | 1                                            | 3                                   |
| HER2/neu (Score 3+)        | Positive                                     | Negative                           | Negative                                     | Positive (Score 3+)                   | Negative                    | Negative                       | Negative (Score 1+)                 | Positive (Score 2+); 10%  | Positive (Score 3+); 90%       | Positive (Score 2+)                          | Positive (Score 3+)                 |
| ER                         | Positive                                     | Negative                           | Negative                                     | Negative                              | Positive 90%                | Positive 10%                   | Positive 95-99%                     | Positive 100%             | Negative                       | Positive 25%                                 | Positive 10%                        |
| PR                         | Positive 40%                                 | Negative                           | Negative                                     | Negative                              | Positive 30%                | Positive 10%                   | Positive 2-3%                       | Positive 80%              | Negative                       | Positive 15%                                 | Positive 10%                        |
| Ki67                       | 20%                                          | 50-55%                             | 80%                                          | 30-35%                                | 18-20%                      | 35%                            | 8-10%                               | 40%                       | 90%                            | 40%                                          | 30-35%                              |
| CA125                      | 9.2                                          | 13.2                               | 7.7                                          | 3.6                                   | 8.2                         | 19.1                           | 5.6                                 | 11.0                      | 3.9                            | 8.8                                          | 6.8                                 |
| CEA                        | 6.3                                          | 3.5                                | 2.3                                          | 11.4                                  | 10.2                        | 5.7                            | 1.1                                 | <0.1                      | 2.3                            | 9.0                                          | 7.2                                 |
| CA15-3                     | 13                                           | 62                                 | 52                                           | 48                                    | 33                          | 67                             | 14                                  | 8.61                      | 27                             | 51                                           | 47                                  |

84

85 The lipid profile of the patients, including total cholesterol, triglyceride, low-density lipoprotein (LDL),  
86 high-density lipoprotein (HDL), and very low-density lipoprotein (VLDL) has been checked by a blood  
87 test. The normal distribution of each factor and the linear correlation between the  $R_{CT}$  and lipid profile  
88 elements were checked by Kolmogorov-Smirnov test, and a simple scatter graph, respectively. Afterward,  
89 the correlation between each lipid profile factor and  $R_{CT}$  value was analyzed using Pearson Correlation  
90 Coefficient at the 2-tailed significance level of 0.01. The results demonstrate that there is no significant  
91 correlation between the lipid profile status of the patients (including total cholesterol, triglyceride, LDL,  
92 HDL, and VLDL) and their  $R_{CT}$  value ( $P > 0.01$ ).

93 **Table S2**, *Lipidic profile of four selected patients. Blood characterizations include complete blood count (CBC), blood*  
94 *biochemistry, serum electrolytes, tumor markers, and liver enzymes have been analyzed in order to find any*  
95 *correlation between the LDP response and blood analyses.*

| Elements                             | Patient #3 | Patient #4 | Patient #6 | Patient #9 |
|--------------------------------------|------------|------------|------------|------------|
| <b>CBC</b>                           |            |            |            |            |
| W.B.C                                | 5.2        | 3          | 7.9        | 3.1        |
| R.B.C                                | 5.18       | 4.41       | 4.38       | 3.04       |
| Hb                                   | 13.3       | 13         | 13         | 8.3        |
| Hct                                  | 40         | 37.8       | 38         | 25.9       |
| M.C.V                                | 77.22      | 85.71      | 86.76      | 85.2       |
| M.C.H                                | 25.68      | 29.48      | 29.68      | 27.3       |
| M.C.H.C                              | 33.25      | 34.39      | 34.21      | 32.05      |
| RDW                                  | 13.6       | 15.6       | 13.5       | 18         |
| PLATELETS                            | 219        | 427        | 296        | 162        |
| <b>Blood Biochemistry</b>            |            |            |            |            |
| FBS                                  | 96         | 91         | 88         | 109        |
| Urea                                 | 31         | 28         | 50         | 31         |
| Creat                                | 0.8        | 0.9        | 1.2        | 0.8        |
| Chol                                 | 222        | 173        | 179        | 191        |
| TG                                   | 177        | 92         | 29         | 370        |
| HDL                                  | 44         | 54         | 57         | 33         |
| LDL                                  | 89         | 89         | 93         | 75         |
| VLDL                                 | 2.023      | 1.648      | 1.632      | 2.273      |
| LDL/HDL                              | 2.023      | 1.648      | 1.632      | 2.273      |
| SGOT(AST)                            | 28         | 37         | 18         | 32         |
| SGPT(ALT)                            | 35         | 18         | 7          | 24         |
| ALP                                  | 268        | 173        | 222        | 187        |
| CPK                                  | 51         | 97         | 50         | 67         |
| LDH                                  | 256        | 389        | 252        | 339        |
| Protein (Total)                      | 7.8        | 7.1        | 7.7        | 6.9        |
| gGT                                  | 32         | 20         | 15         | 16         |
| Albumin                              | 4.6        | 5.5        | 5.1        | 3.8        |
| Bilirubin T&D                        | 0.13       | 0.6        | 0.5        | 0.54       |
| ESR 1h                               | 20         | 33         | 10         | 61         |
| BD                                   | 0.13       | 0.18       | 0.2        | 0.14       |
| <b>Electrolytes</b>                  |            |            |            |            |
| Na                                   | 142        | 138        | 140        | 139        |
| K                                    | 4.59       | 4.8        | 4.7        | 4.29       |
| Ca                                   | 9.8        | 9.9        | 9.8        | 9.1        |
| Ph                                   | 4.1        | 3.4        | 3.3        | 3.4        |
| Mg                                   | 1.8        | 1.9        | 1.9        | 1.6        |
| CRP (Quant)                          | Negative   | Negative   | Negative   | Negative   |
| <b>Tumor Marker</b>                  |            |            |            |            |
| CEA                                  | 2.3        | 11.4       | 1.1        | 2.3        |
| CA15-3                               | 52         | 48         | 14         | 27         |
| CA125                                | 7.7        | 3.6        | 5.6        | 3.9        |
| <b>Immunoassays-Thyroid Function</b> |            |            |            |            |
| Anti TPO                             | 178        |            |            |            |
| <b>Liver Enzymes</b>                 |            |            |            |            |
| PT                                   | 13         | 12.5       | 13         | 12         |
| P.T.T                                | 33         | 31         | 33         | 27         |
| INR                                  | 1          | 1.1        | 1          | 1.1        |

96  
97  
98  
99  
100  
101  
102

103 Permanent pathology has been considered as the gold standard test for cancerous and normal lymph nodes  
 104 diagnosis. As shown in the crosstab table (Figure S3, b), positive predictive value, negative predictive value,  
 105 sensitivity, and specificity of the LDP were 97%, 100%, 100%, and 98%, respectively. Consequently, to  
 106 evaluate these parameters' balance and determine how accurate and predicting LDP is, the receiver  
 107 operating characteristics (ROC) test has been performed. The area under the curve (AUC) of the LDP was  
 108 0.986 (P-value < 0.001, 95% CI: 0.964-1.0). As the AUC of frozen pathology was 0.969 (P-value < 0.001,  
 109 95% CI: 0.93-1.0), it seems that LDP could be used as an appropriate diagnostic tool, same as frozen. It  
 110 should be noted that the obtained values may be due to the small sample size, and more clinical trials with  
 111 a higher number of participants should be conducted to identify these particular characteristics accurately.

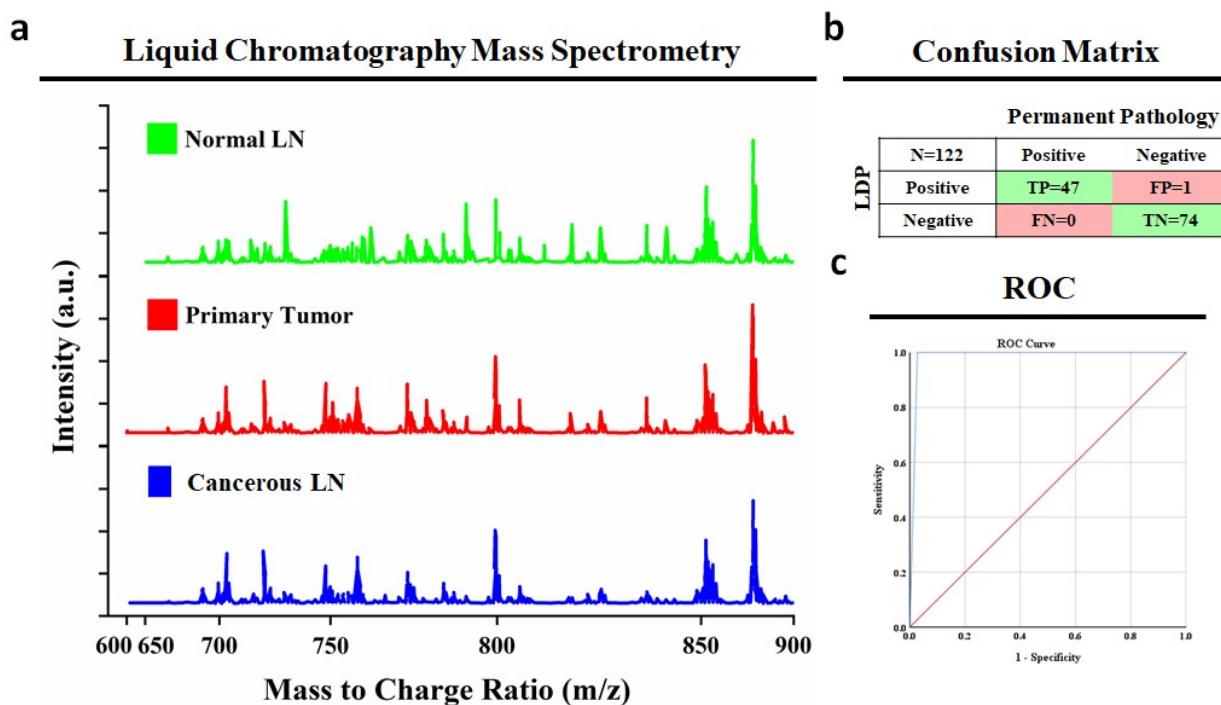

112

113 **Figure S3, a)** Comparing lipidomics mass spectral profiles ( $m/z$  600-900) of normal LN, primary tumor, and involved  
 114 LN. **b)** Confusion matrix for LDP predicted results based on pathological assays (as gold standard) for 122 in-vivo  
 115 samples from 41 patients. (TP: True Positive, FP: False Positive, TN: True Negative, and FN: False Negative). **c)**  
 116 Receiver operating characteristics (ROC) curve of LDP; the area under the curve (AUC) was 0.986, P-value < 0.001,  
 117 95% CI: 0.964-1.0.

118

119

120

121

122

123

124

125

126 **Table S3**, Patients' LNs LDP results, frozen section, permanent pathology section, and LDP result evaluation in  
 127 comparison to permanent histopathological diagnosis in 45 SLNs and 77 non-sentinel LNs and a comparative chart  
 128 for the measured  $R_{CT}$  of patients' LNs. The red dashed line defines the border of normal and involved LNs at 110 k $\Omega$ .  
 129 True-positive and false-positive results have been specified in the entire green and red rows, respectively. Each test  
 130 was repeated for 5 times with STD:  $\pm 5\%$ .

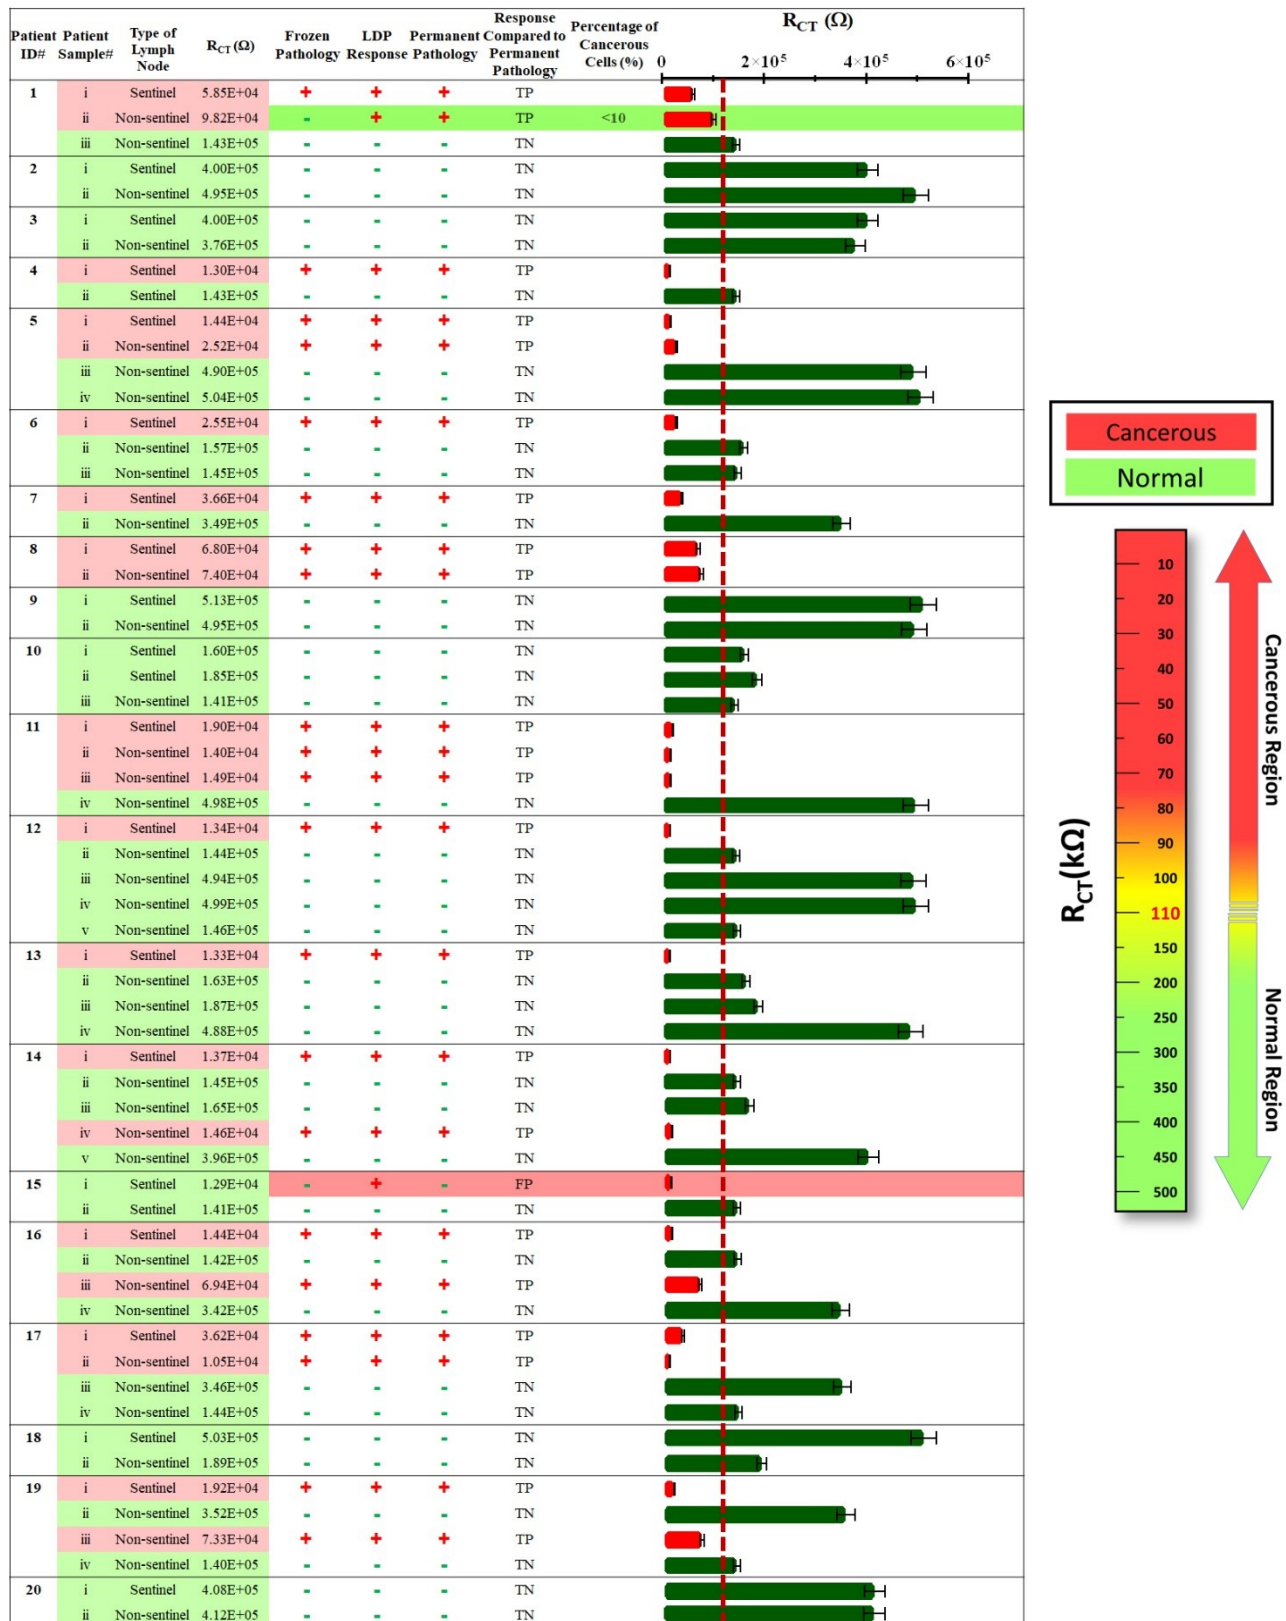



| Patient ID# | Patient Sample# | Type of Lymph Node | $R_{CT} (\Omega)$ | Frozen Pathology | LDP Response | Permanent Pathology | Response Compared to Permanent Pathology | Percentage of Cancerous Cells (%) | $R_{CT} (\Omega)$ |                 |
|-------------|-----------------|--------------------|-------------------|------------------|--------------|---------------------|------------------------------------------|-----------------------------------|-------------------|-----------------|
|             |                 |                    |                   |                  |              |                     |                                          |                                   | 0                 | $6 \times 10^5$ |
| 21          | i               | Sentinel           | 1.38E+05          | -                | -            | -                   | TN                                       |                                   |                   |                 |
|             | ii              | Non-sentinel       | 1.47E+05          | -                | -            | -                   | TN                                       |                                   |                   |                 |
| 22          | i               | Sentinel           | 1.40E+05          | -                | -            | -                   | TN                                       |                                   |                   |                 |
|             | ii              | Non-sentinel       | 4.04E+05          | -                | -            | -                   | TN                                       |                                   |                   |                 |
| 23          | i               | Sentinel           | 1.86E+04          | +                | +            | +                   | TP                                       |                                   |                   |                 |
|             | ii              | Non-sentinel       | 1.52E+04          | +                | +            | +                   | TP                                       |                                   |                   |                 |
|             | iii             | Non-sentinel       | 1.40E+05          | -                | -            | -                   | TN                                       |                                   |                   |                 |
|             | iv              | Non-sentinel       | 1.42E+05          | -                | -            | -                   | TN                                       |                                   |                   |                 |
| 24          | i               | Sentinel           | 1.81E+05          | -                | -            | -                   | TN                                       |                                   |                   |                 |
|             | ii              | Non-sentinel       | 5.08E+05          | -                | -            | -                   | TN                                       |                                   |                   |                 |
| 25          | i               | Sentinel           | 1.94E+04          | +                | +            | +                   | TP                                       |                                   |                   |                 |
|             | ii              | Non-sentinel       | 1.48E+04          | +                | +            | +                   | TP                                       |                                   |                   |                 |
|             | iii             | Non-sentinel       | 1.44E+05          | -                | -            | -                   | TN                                       |                                   |                   |                 |
|             | iv              | Non-sentinel       | 5.00E+05          | -                | -            | -                   | TN                                       |                                   |                   |                 |
| 26          | i               | Sentinel           | 1.62E+05          | -                | -            | -                   | TN                                       |                                   |                   |                 |
|             | ii              | Sentinel           | 3.96E+05          | -                | -            | -                   | TN                                       |                                   |                   |                 |
| 27          | i               | Sentinel           | 3.80E+05          | -                | -            | -                   | TN                                       |                                   |                   |                 |
|             | ii              | Non-sentinel       | 1.44E+05          | -                | -            | -                   | TN                                       |                                   |                   |                 |
| 28          | i               | Sentinel           | 1.03E+04          | +                | +            | +                   | TP                                       |                                   |                   |                 |
|             | ii              | Non-sentinel       | 7.47E+04          | +                | +            | +                   | TP                                       |                                   |                   |                 |
|             | iii             | Non-sentinel       | 1.41E+04          | +                | +            | +                   | TP                                       |                                   |                   |                 |
|             | iv              | Non-sentinel       | 1.40E+05          | -                | -            | -                   | TN                                       |                                   |                   |                 |
| 29          | i               | Sentinel           | 1.00E+03          | +                | +            | +                   | TP                                       |                                   |                   |                 |
|             | ii              | Non-sentinel       | 9.40E+04          | -                | +            | +                   | TP                                       | ≤5                                |                   |                 |
|             | iii             | Non-sentinel       | 1.04E+04          | +                | +            | +                   | TP                                       |                                   |                   |                 |
| 30          | i               | Sentinel           | 1.31E+04          | +                | +            | +                   | TP                                       |                                   |                   |                 |
|             | ii              | Non-sentinel       | 2.60E+04          | +                | +            | +                   | TP                                       |                                   |                   |                 |
|             | iii             | Non-sentinel       | 1.42E+05          | -                | -            | -                   | TN                                       |                                   |                   |                 |
|             | iv              | Non-sentinel       | 1.38E+05          | -                | -            | -                   | TN                                       |                                   |                   |                 |
| 31          | i               | Sentinel           | 9.62E+04          | +                | +            | +                   | TP                                       |                                   |                   |                 |
|             | ii              | Non-sentinel       | 1.58E+05          | -                | -            | -                   | TN                                       |                                   |                   |                 |
|             | iii             | Non-sentinel       | 3.87E+05          | -                | -            | -                   | TN                                       |                                   |                   |                 |
| 32          | i               | Sentinel           | 1.07E+04          | +                | +            | +                   | TP                                       |                                   |                   |                 |
|             | ii              | Non-sentinel       | 1.39E+04          | +                | +            | +                   | TP                                       |                                   |                   |                 |
|             | iii             | Non-sentinel       | 1.47E+05          | -                | -            | -                   | TN                                       |                                   |                   |                 |
| 33          | i               | Sentinel           | 2.60E+04          | +                | +            | +                   | TP                                       |                                   |                   |                 |
|             | ii              | Non-sentinel       | 3.39E+05          | -                | -            | -                   | TN                                       |                                   |                   |                 |
|             | iii             | Non-sentinel       | 4.89E+04          | +                | +            | +                   | TP                                       |                                   |                   |                 |
|             | iv              | Non-sentinel       | 3.59E+05          | -                | -            | -                   | TN                                       |                                   |                   |                 |
| 34          | i               | Sentinel           | 1.65E+05          | -                | -            | -                   | TN                                       |                                   |                   |                 |
|             | ii              | Non-sentinel       | 5.13E+05          | -                | -            | -                   | TN                                       |                                   |                   |                 |
| 35          | i               | Sentinel           | 3.65E+05          | -                | -            | -                   | TN                                       |                                   |                   |                 |
|             | ii              | Non-sentinel       | 1.45E+05          | -                | -            | -                   | TN                                       |                                   |                   |                 |
| 36          | i               | Sentinel           | 3.55E+04          | +                | +            | +                   | TP                                       |                                   |                   |                 |
|             | ii              | Non-sentinel       | 7.18E+04          | +                | +            | +                   | TP                                       |                                   |                   |                 |
|             | iii             | Non-sentinel       | 5.10E+05          | -                | -            | -                   | TN                                       |                                   |                   |                 |
|             | iv              | Non-sentinel       | 1.47E+05          | -                | -            | -                   | TN                                       |                                   |                   |                 |
| 37          | i               | Sentinel           | 1.96E+04          | +                | +            | +                   | TP                                       |                                   |                   |                 |
|             | ii              | Non-sentinel       | 1.39E+05          | -                | -            | -                   | TN                                       |                                   |                   |                 |
|             | iii             | Non-sentinel       | 1.34E+04          | +                | +            | +                   | TP                                       |                                   |                   |                 |
|             | iv              | Non-sentinel       | 1.39E+05          | -                | -            | -                   | TN                                       |                                   |                   |                 |
| 38          | i               | Sentinel           | 5.67E+04          | +                | +            | +                   | TP                                       |                                   |                   |                 |
|             | ii              | Non-sentinel       | 1.48E+04          | +                | +            | +                   | TP                                       |                                   |                   |                 |
|             | iii             | Non-sentinel       | 1.79E+05          | -                | -            | -                   | TN                                       |                                   |                   |                 |
| 39          | i               | Sentinel           | 1.30E+04          | +                | +            | +                   | TP                                       |                                   |                   |                 |
|             | ii              | Non-sentinel       | 1.45E+05          | -                | -            | -                   | TN                                       |                                   |                   |                 |
|             | iii             | Non-sentinel       | 3.88E+05          | -                | -            | -                   | TN                                       |                                   |                   |                 |
| 40          | i               | Sentinel           | 4.80E+05          | -                | -            | -                   | TN                                       |                                   |                   |                 |
|             | ii              | Non-sentinel       | 1.47E+05          | -                | -            | -                   | TN                                       |                                   |                   |                 |
| 41          | i               | Sentinel           | 2.60E+04          | +                | +            | +                   | TP                                       |                                   |                   |                 |
|             | ii              | Non-sentinel       | 3.39E+05          | -                | -            | -                   | TN                                       |                                   |                   |                 |

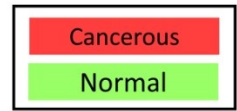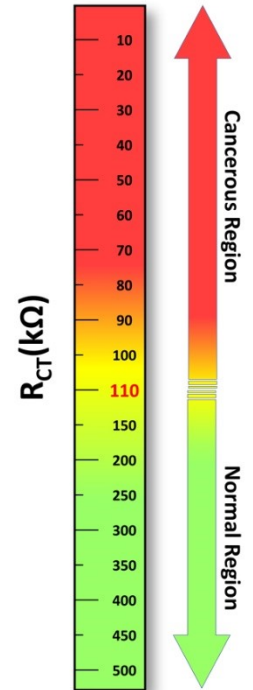

133  
134  
135  
136  
137  
138

139 The repeatability and stability of the LDP sensor were investigated using different methods of *in-vitro* and  
 140 *in-vivo* tests. For the *in-vitro* investigation, the sensor was tested by a lipidic solution (MDA-MB-231  
 141 media) 21 times. The sensor was gently rinsed using sequential washing with 70% methanol and deionized  
 142 (DI) water, respectively, and then dried in nitrogen flow. Figure S4-a depicts the results of LDP repeatability  
 143 tests with the lipidic solution. The LDP repeated the same results for 13 tests; afterward, the results ( $R_{CT}$ )  
 144 decreased till test #18 that the sensor lost its semi-circle response at all. The given results depict the LDP  
 145 repeatability and stability in its response.

146 Animal lymph node (10 times, Figure S4-b) and dissected human lymph node (2 times, Figure S4-c) were  
 147 examined for investigating *in-vivo* repeatability tests. Rabbit popliteal lymph node was tested 10 times. The  
 148 LDP sensor was gently rinsed using sequential washing with 70% methanol and deionized (DI) water,  
 149 respectively, and then dried in nitrogen flow. LDP results of animal lymph node depict the sensor repeat its  
 150 response 8 times. LDP in the human axillary lymph node copied its first response exactly. Additionally, to  
 151 follow the legal considerations on testing human samples *in-vivo* for our future aims, we will not use a  
 152 sensor twice.

153

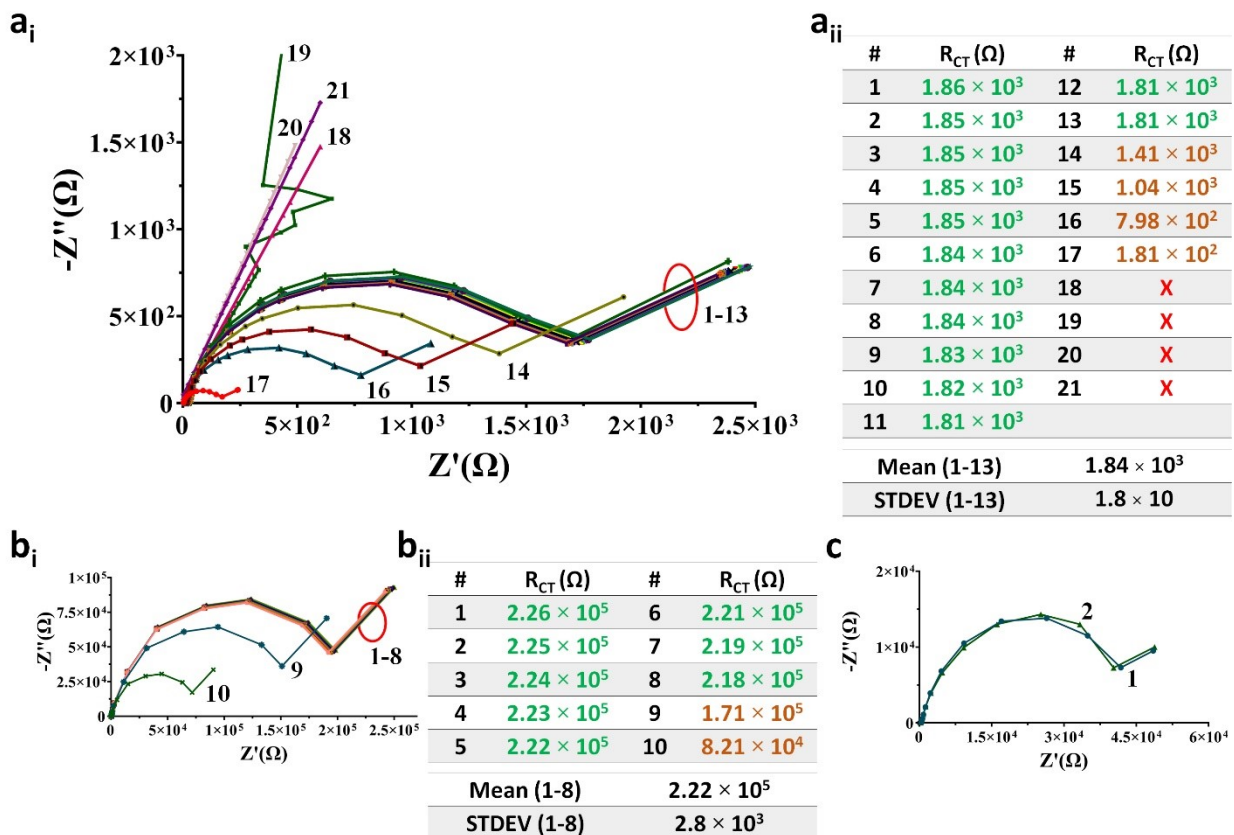

154

155 **Figure S4**, a<sub>i</sub>) LDP response for the lipidic solution. The sensor was tested 21 times to investigate the repeatability of  
 156 the responses. a<sub>ii</sub>) The responses were almost the same as the first result till test #14. b<sub>i</sub>) The responses of the LDP in  
 157 testing animal lymph node. The responses were almost the same for 8 tests. b<sub>ii</sub>) The results depict the same  $R_{CT}$  which  
 158 shows the reliability of the LDP sensor. c) The results of LDP in testing human axillary lymph node.

159

160

161 **References**

162

163 1 C. kun Lee, S. hwan Jeong, C. Jang, H. Bae, Y. H. Kim, I. Park, S. K. Kim  
164 and G. Y. Koh, *Science (80-. )*, 2019, **363**, 644–649.

165 2 M. Chen and J. Huang, 2019, **2**, 183–191.

166 3 K. C. Corn, M. A. Windham and M. Rafat, *Prog. Lipid Res.*, 2020, 101055.

167
